# Supplementary material for: Targeted scavenging of extracellular ROS relieves suppressive immunogenic cell death
Source: PubMed Central journal article supplement (PMC7532538; doi:10.1038/s41467-020-18745-6), 2020-10-02
Supplement: 41467_2020_18745_MOESM3_ESM.pdf [file 41467_2020_18745_MOESM3_ESM.pdf]

## Reporting Summary

Nature Research wishes to improve the reproducibility of the work that we publish. This form provides structure for consistency and transparency in reporting. For further information on Nature Research policies, see our [Editorial Policies](#) and the [Editorial Policy Checklist](#).

### Statistics

For all statistical analyses, confirm that the following items are present in the figure legend, table legend, main text, or Methods section.

n/a Confirmed

- The exact sample size ( $n$ ) for each experimental group/condition, given as a discrete number and unit of measurement
- A statement on whether measurements were taken from distinct samples or whether the same sample was measured repeatedly
- The statistical test(s) used AND whether they are one- or two-sided  
*Only common tests should be described solely by name; describe more complex techniques in the Methods section.*
- A description of all covariates tested
- A description of any assumptions or corrections, such as tests of normality and adjustment for multiple comparisons
- A full description of the statistical parameters including central tendency (e.g. means) or other basic estimates (e.g. regression coefficient) AND variation (e.g. standard deviation) or associated estimates of uncertainty (e.g. confidence intervals)
- For null hypothesis testing, the test statistic (e.g.  $F$ ,  $t$ ,  $r$ ) with confidence intervals, effect sizes, degrees of freedom and  $P$  value noted  
*Give  $P$  values as exact values whenever suitable.*
- For Bayesian analysis, information on the choice of priors and Markov chain Monte Carlo settings
- For hierarchical and complex designs, identification of the appropriate level for tests and full reporting of outcomes
- Estimates of effect sizes (e.g. Cohen's  $d$ , Pearson's  $r$ ), indicating how they were calculated

*Our web collection on [statistics for biologists](#) contains articles on many of the points above.*

### Software and code

Policy information about [availability of computer code](#)

**Data collection** UV-vis absorption spectra were obtained on a Genesys 10S UV-Vis spectrophotometer (Thermo Scientific, Waltham, MA). Proton nuclear magnetic resonance (1H-NMR) spectra were recorded on a Bruker AV300 scanner using D2O, DMSO-d6 and CDCl3 as the solvent. The size of nanoparticles were measured by a SZ-100 nano particles analyzer (HORIBA Scientific, USA). Transmission electron microscopy (TEM) images were acquired on a Tecnai TF30 transmission electron microscope (TEM) (FEI, Hillsboro, OR). The concentrations of zinc were detected by inductively coupled plasma optical emission spectroscopy (ICP-OES, Agilent 720-ES). Confocal microscopy images were acquired on a Zeiss LSM 780 microscope. X-ray photoelectron spectroscopic spectrum was tested with a high sensitivity Kratos AXIS 165 spectrometer. PA images were acquired with a Visual Sonic Vevo 2100 LAZR system.

**Data analysis** ChemBioDraw Ultra 13.0/Origin 2018/Graphpad prism 7/FlowJo\_V10/Image J (1.52a, Java 1.8.0\_66)

For manuscripts utilizing custom algorithms or software that are central to the research but not yet described in published literature, software must be made available to editors and reviewers. We strongly encourage code deposition in a community repository (e.g. GitHub). See the Nature Research [guidelines for submitting code & software](#) for further information.

### Data

Policy information about [availability of data](#)

All manuscripts must include a [data availability statement](#). This statement should provide the following information, where applicable:

- Accession codes, unique identifiers, or web links for publicly available datasets
- A list of figures that have associated raw data
- A description of any restrictions on data availability

The source data underlying all main figures (Figs. 2d-j, 3b-f, h-j, n, p, 4b, d, f, g, l, 5b, k, m, 6b, f) are provided as a Source Data file. The experimental data that support the findings in the current study are available for research purposes within the paper and its Supplementary Information from the corresponding authors

## Field-specific reporting

Please select the one below that is the best fit for your research. If you are not sure, read the appropriate sections before making your selection.

Life sciences  Behavioural & social sciences  Ecological, evolutionary & environmental sciences

For a reference copy of the document with all sections, see [nature.com/documents/nr-reporting-summary-flat.pdf](https://www.nature.com/documents/nr-reporting-summary-flat.pdf)

## Life sciences study design

All studies must disclose on these points even when the disclosure is negative.

|                 |                                                                                                                                                                                                                                                                                                                                                                                                                                                                                                                    |
|-----------------|--------------------------------------------------------------------------------------------------------------------------------------------------------------------------------------------------------------------------------------------------------------------------------------------------------------------------------------------------------------------------------------------------------------------------------------------------------------------------------------------------------------------|
| Sample size     | Sample sizes were not chosen based on statistical method. Samples sized was chosen as large as possible to be sufficient to obtain statistics (n= 5-25). For in vitro experiments, samples were prepared and measured a minimum of three twice. For in vivo experiments, each group has 5 biologically independent mice. All data are reported as mean $\pm$ standard deviation (SD) from at least three independent runs. Significant differences in the mean values were evaluated by Student's unpaired t-test. |
| Data exclusions | No data was excluded                                                                                                                                                                                                                                                                                                                                                                                                                                                                                               |
| Replication     | Every experiment at replication was successful. All experiments were performed a minimum of three replicates in independent experiments with similar results.                                                                                                                                                                                                                                                                                                                                                      |
| Randomization   | Randomly grouped                                                                                                                                                                                                                                                                                                                                                                                                                                                                                                   |
| Blinding        | The investigators were blinded to group allocation during data collection and analysis                                                                                                                                                                                                                                                                                                                                                                                                                             |

## Behavioural & social sciences study design

All studies must disclose on these points even when the disclosure is negative.

|                   |                                                                                                                                                                                                                                                                                                                                                                                                                                                                                 |
|-------------------|---------------------------------------------------------------------------------------------------------------------------------------------------------------------------------------------------------------------------------------------------------------------------------------------------------------------------------------------------------------------------------------------------------------------------------------------------------------------------------|
| Study description | Briefly describe the study type including whether data are quantitative, qualitative, or mixed-methods (e.g. qualitative cross-sectional, quantitative experimental, mixed-methods case study).                                                                                                                                                                                                                                                                                 |
| Research sample   | State the research sample (e.g. Harvard university undergraduates, villagers in rural India) and provide relevant demographic information (e.g. age, sex) and indicate whether the sample is representative. Provide a rationale for the study sample chosen. For studies involving existing datasets, please describe the dataset and source.                                                                                                                                  |
| Sampling strategy | Describe the sampling procedure (e.g. random, snowball, stratified, convenience). Describe the statistical methods that were used to predetermine sample size OR if no sample-size calculation was performed, describe how sample sizes were chosen and provide a rationale for why these sample sizes are sufficient. For qualitative data, please indicate whether data saturation was considered, and what criteria were used to decide that no further sampling was needed. |
| Data collection   | Provide details about the data collection procedure, including the instruments or devices used to record the data (e.g. pen and paper, computer, eye tracker, video or audio equipment) whether anyone was present besides the participant(s) and the researcher, and whether the researcher was blind to experimental condition and/or the study hypothesis during data collection.                                                                                            |
| Timing            | Indicate the start and stop dates of data collection. If there is a gap between collection periods, state the dates for each sample cohort.                                                                                                                                                                                                                                                                                                                                     |
| Data exclusions   | If no data were excluded from the analyses, state so OR if data were excluded, provide the exact number of exclusions and the rationale behind them, indicating whether exclusion criteria were pre-established.                                                                                                                                                                                                                                                                |
| Non-participation | State how many participants dropped out/declined participation and the reason(s) given OR provide response rate OR state that no participants dropped out/declined participation.                                                                                                                                                                                                                                                                                               |
| Randomization     | If participants were not allocated into experimental groups, state so OR describe how participants were allocated to groups, and if allocation was not random, describe how covariates were controlled.                                                                                                                                                                                                                                                                         |

## Ecological, evolutionary & environmental sciences study design

All studies must disclose on these points even when the disclosure is negative.

|                   |                                                                                                                                                                                                                |
|-------------------|----------------------------------------------------------------------------------------------------------------------------------------------------------------------------------------------------------------|
| Study description | Briefly describe the study. For quantitative data include treatment factors and interactions, design structure (e.g. factorial, nested, hierarchical), nature and number of experimental units and replicates. |
|-------------------|----------------------------------------------------------------------------------------------------------------------------------------------------------------------------------------------------------------|

**Research sample** *Describe the research sample (e.g. a group of tagged *Passer domesticus*, all *Stenocereus thurberi* within Organ Pipe Cactus National Monument), and provide a rationale for the sample choice. When relevant, describe the organism taxa, source, sex, age range and any manipulations. State what population the sample is meant to represent when applicable. For studies involving existing datasets, describe the data and its source.*

**Sampling strategy** *Note the sampling procedure. Describe the statistical methods that were used to predetermine sample size OR if no sample-size calculation was performed, describe how sample sizes were chosen and provide a rationale for why these sample sizes are sufficient.*

**Data collection** *Describe the data collection procedure, including who recorded the data and how.*

**Timing and spatial scale** *Indicate the start and stop dates of data collection, noting the frequency and periodicity of sampling and providing a rationale for these choices. If there is a gap between collection periods, state the dates for each sample cohort. Specify the spatial scale from which the data are taken*

**Data exclusions** *If no data were excluded from the analyses, state so OR if data were excluded, describe the exclusions and the rationale behind them, indicating whether exclusion criteria were pre-established.*

**Reproducibility** *Describe the measures taken to verify the reproducibility of experimental findings. For each experiment, note whether any attempts to repeat the experiment failed OR state that all attempts to repeat the experiment were successful.*

**Randomization** *Describe how samples/organisms/participants were allocated into groups. If allocation was not random, describe how covariates were controlled. If this is not relevant to your study, explain why.*

**Blinding** *Describe the extent of blinding used during data acquisition and analysis. If blinding was not possible, describe why OR explain why blinding was not relevant to your study.*

Did the study involve field work?  Yes  No

## Field work, collection and transport

**Field conditions** *Describe the study conditions for field work, providing relevant parameters (e.g. temperature, rainfall).*

**Location** *State the location of the sampling or experiment, providing relevant parameters (e.g. latitude and longitude, elevation, water depth).*

**Access & import/export** *Describe the efforts you have made to access habitats and to collect and import/export your samples in a responsible manner and in compliance with local, national and international laws, noting any permits that were obtained (give the name of the issuing authority, the date of issue, and any identifying information).*

**Disturbance** *Describe any disturbance caused by the study and how it was minimized.*

## Reporting for specific materials, systems and methods

We require information from authors about some types of materials, experimental systems and methods used in many studies. Here, indicate whether each material, system or method listed is relevant to your study. If you are not sure if a list item applies to your research, read the appropriate section before selecting a response.

### Materials & experimental systems

| n/a                                 | Involved in the study                                           |
|-------------------------------------|-----------------------------------------------------------------|
| <input type="checkbox"/>            | <input checked="" type="checkbox"/> Antibodies                  |
| <input type="checkbox"/>            | <input checked="" type="checkbox"/> Eukaryotic cell lines       |
| <input checked="" type="checkbox"/> | <input type="checkbox"/> Palaeontology and archaeology          |
| <input type="checkbox"/>            | <input checked="" type="checkbox"/> Animals and other organisms |
| <input checked="" type="checkbox"/> | <input type="checkbox"/> Human research participants            |
| <input checked="" type="checkbox"/> | <input type="checkbox"/> Clinical data                          |
| <input checked="" type="checkbox"/> | <input type="checkbox"/> Dual use research of concern           |

### Methods

| n/a                                 | Involved in the study                              |
|-------------------------------------|----------------------------------------------------|
| <input checked="" type="checkbox"/> | <input type="checkbox"/> ChIP-seq                  |
| <input type="checkbox"/>            | <input checked="" type="checkbox"/> Flow cytometry |
| <input checked="" type="checkbox"/> | <input type="checkbox"/> MRI-based neuroimaging    |

## Antibodies

**Antibodies used**

PE-Cy5 anti-mouse CD4, Abcam, catalog n. ab25476  
 PE-Cy7 anti-mouse CD8, Abcam, catalog n. ab39853  
 Alexa Fluor® 700 anti-mouse CD25, Biolegend, catalog n. 102024  
 PE anti-mouse Foxp3, Biolegend, catalog n. 126404  
 APC anti-mouse CD62L, Biolegend, catalog n. 104411  
 PerCP anti-mouse CD44, Biolegend, catalog n. 103036  
 FITC- anti-mouse CD80, Abcam, catalog n. ab95550  
 PE- anti-mouse CD86, Biolegend, catalog n. 159203  
 PerCP/Cy5.5 anti-mouse IFN- $\gamma$ , Fisher scientific, catalog n. ab505821

APC/Cyanine7 anti-mouse CD11c, Biolegend, catalog n. 117324  
 anti-HMGB1 Antibody, Biolegend, catalog n. 651402  
 Anti-mouse Calreticulin, Abcam, catalog n. ab227444  
 Anti-Collagen I antibody, Abcam, catalog n. ab34710  
 Goat anti-mouse IgG-HRP, Abcam, catalog n. ab97023  
 Goat anti-rabbit IgG-HRP, Abcam, catalog n. ab205718  
 Goat anti-rabbit IgG-FITC, Abcam, catalog n. ab97050  
 Goat anti-rabbit IgG-APC, Biolegend, catalog n 405308

## Validation

The antibodies are verified by the supplier. The quality test data was showed on the manufacturers' websites as following.

PE-Cy5 anti-mouse CD4, Abcam, catalog n. ab25476  
<https://www.abcam.com/cd8-alpha-antibody-53-67-pecy7-ab39853.html>

PE-Cy7 anti-mouse CD8, Abcam, catalog n. ab39853  
<https://www.abcam.com/cd8-alpha-antibody-53-67-pecy7-ab39853.html>

Alexa Fluor® 700 anti-mouse CD25, Biolegend, catalog n. 102024  
<https://www.biolegend.com/en-us/products/alexa-fluor-700-anti-mouse-cd25-antibody-3389>

PE anti-mouse Foxp3, Biolegend, catalog n. 126404  
<https://www.biolegend.com/en-us/products/pe-anti-mouse-foxp3-antibody-4660>

APC anti-mouse CD62L, Biolegend, catalog n. 104411  
<https://www.biolegend.com/en-us/products/apc-anti-mouse-cd62l-antibody-381>

PerCP anti-mouse CD44, Biolegend, catalog n. 103036  
<https://www.biolegend.com/en-us/products/percp-anti-mouse-human-cd44-antibody-6895>

FITC- anti-mouse CD80, Abcam, catalog n. ab95550  
<https://www.abcam.com/cd8-alpha-antibody-53-67-pecy7-ab39853.html>

PE- anti-mouse CD86, Biolegend, catalog n. 159203  
<https://www.biolegend.com/en-us/products/pe-anti-mouse-cd86-antibody-18945>

PerCP/Cy5.5 anti-mouse IFN- $\gamma$ , Fisher scientific, catalog n. ab505821  
<https://www.thermofisher.com/antibody/product/IFN-gamma-Antibody-clone-XMG1-2-Monoclonal/45-7311-82>

APC/Cyanine7 anti-mouse CD11c, Biolegend, catalog n. 117324  
<https://www.biolegend.com/en-us/products/apc-cyanine7-anti-mouse-cd11c-antibody-3931>

anti-HMGB1 Antibody, Biolegend, catalog n. 651402  
<https://www.biolegend.com/en-us/products/purified-anti-hmgb1-antibody-7483>

Anti-mouse Calreticulin, Abcam, catalog n. ab227444  
<https://www.abcam.com/cd8-alpha-antibody-53-67-pecy7-ab39853.html>

Anti-Collagen I antibody, Abcam, catalog n. ab34710  
<https://www.abcam.com/cd8-alpha-antibody-53-67-pecy7-ab39853.html>

Goat anti-mouse IgG-HRP, Abcam, catalog n. ab97023  
<https://www.abcam.com/cd8-alpha-antibody-53-67-pecy7-ab39853.html>

Goat anti-rabbit IgG-HRP, Abcam, catalog n. ab205718  
<https://www.abcam.com/cd8-alpha-antibody-53-67-pecy7-ab39853.html>

Goat anti-rabbit IgG-FITC, Abcam, catalog n. ab97050  
<https://www.abcam.com/goat-rabbit-igg-hl-fitc-ab97050.html>

Goat anti-rabbit IgG-APC, Biolegend, catalog n 405308  
<https://www.biolegend.com/en-us/products/apc-goat-anti-mouse-igg-minimal-x-reactivity-1383>

## Eukaryotic cell lines

Policy information about [cell lines](#)

|                                                                      |                                                                                               |
|----------------------------------------------------------------------|-----------------------------------------------------------------------------------------------|
| Cell line source(s)                                                  | 4T1 and CT26: ATCC                                                                            |
| Authentication                                                       | The cells lines were authenticated by the NIBIB-tissue culture facility for pathogen testing. |
| Mycoplasma contamination                                             | Negative for mycoplasma                                                                       |
| Commonly misidentified lines<br>(See <a href="#">ICLAC</a> register) | No misidentified lines                                                                        |

## Palaeontology and Archaeology

|                     |                                                                                                                                                                                                             |
|---------------------|-------------------------------------------------------------------------------------------------------------------------------------------------------------------------------------------------------------|
| Specimen provenance | <i>Provide provenance information for specimens and describe permits that were obtained for the work (including the name of the issuing authority, the date of issue, and any identifying information).</i> |
| Specimen deposition | <i>Indicate where the specimens have been deposited to permit free access by other researchers.</i>                                                                                                         |

## Dating methods

*If new dates are provided, describe how they were obtained (e.g. collection, storage, sample pretreatment and measurement), where they were obtained (i.e. lab name), the calibration program and the protocol for quality assurance OR state that no new dates are provided.*

Tick this box to confirm that the raw and calibrated dates are available in the paper or in Supplementary Information.

## Ethics oversight

*Identify the organization(s) that approved or provided guidance on the study protocol, OR state that no ethical approval or guidance was required and explain why not.*

Note that full information on the approval of the study protocol must also be provided in the manuscript.

## Animals and other organisms

Policy information about [studies involving animals](#); [ARRIVE guidelines](#) recommended for reporting animal research

## Laboratory animals

BALB/C mice, female, 6-8 weeks were purchased from Harlan. The animals were hosted in equipped animal facility with temperature at 68-79 F and humidity at 30%-70%, under the same dark/light cycle (12:12).

## Wild animals

No wild animals were used

## Field-collected samples

No field-collection

## Ethics oversight

All animal experiments were performed under a National Institutes of Health Animal Care and Use Committee (NIHACUC) approved protocol.

Note that full information on the approval of the study protocol must also be provided in the manuscript.

## Human research participants

Policy information about [studies involving human research participants](#)

## Population characteristics

*Describe the covariate-relevant population characteristics of the human research participants (e.g. age, gender, genotypic information, past and current diagnosis and treatment categories). If you filled out the behavioural & social sciences study design questions and have nothing to add here, write "See above."*

## Recruitment

*Describe how participants were recruited. Outline any potential self-selection bias or other biases that may be present and how these are likely to impact results.*

## Ethics oversight

*Identify the organization(s) that approved the study protocol.*

Note that full information on the approval of the study protocol must also be provided in the manuscript.

## Clinical data

Policy information about [clinical studies](#)

All manuscripts should comply with the [ICMJE guidelines for publication of clinical research](#) and a completed [CONSORT checklist](#) must be included with all submissions.

## Clinical trial registration

*Provide the trial registration number from ClinicalTrials.gov or an equivalent agency.*

## Study protocol

*Note where the full trial protocol can be accessed OR if not available, explain why.*

## Data collection

*Describe the settings and locales of data collection, noting the time periods of recruitment and data collection.*

## Outcomes

*Describe how you pre-defined primary and secondary outcome measures and how you assessed these measures.*

## Dual use research of concern

Policy information about [dual use research of concern](#)

### Hazards

Could the accidental, deliberate or reckless misuse of agents or technologies generated in the work, or the application of information presented in the manuscript, pose a threat to:

- | No                       | Yes                      |                            |
|--------------------------|--------------------------|----------------------------|
| <input type="checkbox"/> | <input type="checkbox"/> | Public health              |
| <input type="checkbox"/> | <input type="checkbox"/> | National security          |
| <input type="checkbox"/> | <input type="checkbox"/> | Crops and/or livestock     |
| <input type="checkbox"/> | <input type="checkbox"/> | Ecosystems                 |
| <input type="checkbox"/> | <input type="checkbox"/> | Any other significant area |

## Experiments of concern

Does the work involve any of these experiments of concern:

- | No                       | Yes                      |                                                                             |
|--------------------------|--------------------------|-----------------------------------------------------------------------------|
| <input type="checkbox"/> | <input type="checkbox"/> | Demonstrate how to render a vaccine ineffective                             |
| <input type="checkbox"/> | <input type="checkbox"/> | Confer resistance to therapeutically useful antibiotics or antiviral agents |
| <input type="checkbox"/> | <input type="checkbox"/> | Enhance the virulence of a pathogen or render a nonpathogen virulent        |
| <input type="checkbox"/> | <input type="checkbox"/> | Increase transmissibility of a pathogen                                     |
| <input type="checkbox"/> | <input type="checkbox"/> | Alter the host range of a pathogen                                          |
| <input type="checkbox"/> | <input type="checkbox"/> | Enable evasion of diagnostic/detection modalities                           |
| <input type="checkbox"/> | <input type="checkbox"/> | Enable the weaponization of a biological agent or toxin                     |
| <input type="checkbox"/> | <input type="checkbox"/> | Any other potentially harmful combination of experiments and agents         |

## ChIP-seq

### Data deposition

- Confirm that both raw and final processed data have been deposited in a public database such as [GEO](#).
- Confirm that you have deposited or provided access to graph files (e.g. BED files) for the called peaks.

Data access links

May remain private before publication.

For "Initial submission" or "Revised version" documents, provide reviewer access links. For your "Final submission" document, provide a link to the deposited data.

Files in database submission

Provide a list of all files available in the database submission.

Genome browser session

(e.g. [UCSC](#))

Provide a link to an anonymized genome browser session for "Initial submission" and "Revised version" documents only, to enable peer review. Write "no longer applicable" for "Final submission" documents.

### Methodology

Replicates

Describe the experimental replicates, specifying number, type and replicate agreement.

Sequencing depth

Describe the sequencing depth for each experiment, providing the total number of reads, uniquely mapped reads, length of reads and whether they were paired- or single-end.

Antibodies

Describe the antibodies used for the ChIP-seq experiments; as applicable, provide supplier name, catalog number, clone name, and lot number.

Peak calling parameters

Specify the command line program and parameters used for read mapping and peak calling, including the ChIP, control and index files used.

Data quality

Describe the methods used to ensure data quality in full detail, including how many peaks are at FDR 5% and above 5-fold enrichment.

Software

Describe the software used to collect and analyze the ChIP-seq data. For custom code that has been deposited into a community repository, provide accession details.

## Flow Cytometry

### Plots

Confirm that:

- The axis labels state the marker and fluorochrome used (e.g. CD4-FITC).
- The axis scales are clearly visible. Include numbers along axes only for bottom left plot of group (a 'group' is an analysis of identical markers).
- All plots are contour plots with outliers or pseudocolor plots.
- A numerical value for number of cells or percentage (with statistics) is provided.

### Methodology

Sample preparation

For tissue samples, tissues were mechanically disrupted and collected from mice. Then, the isolated tissues were cut into pieces and washed with cold staining buffer several times to obtain the single cell suspensions. Digestive enzyme (Collagenase IV (1 mg/mL)) was added for 6 h. The cell suspension was filtered through a 70- $\mu$ m cell strainer to remove undegraded tissues. ACK lysis buffer (Ggbco) was added into the cell suspension. After 10 min, the single cell suspension was washed with flow cytometry buffer and then stained with the indicated antibodies.

Instrument

Software

Cell population abundance

Gating strategy

Tick this box to confirm that a figure exemplifying the gating strategy is provided in the Supplementary Information.

## Magnetic resonance imaging

### Experimental design

Design type

Design specifications

Behavioral performance measures

### Acquisition

Imaging type(s)

Field strength

Sequence & imaging parameters

Area of acquisition

Diffusion MRI  Used  Not used

### Preprocessing

Preprocessing software

Normalization

Normalization template

Noise and artifact removal

Volume censoring

### Statistical modeling & inference

Model type and settings

Effect(s) tested

Specify type of analysis:  Whole brain  ROI-based  Both

Statistic type for inference (See [Eklund et al. 2016](#))

Correction

## Models & analysis

- n/a | Involved in the study
- Functional and/or effective connectivity
- Graph analysis
- Multivariate modeling or predictive analysis

Functional and/or effective connectivity

*Report the measures of dependence used and the model details (e.g. Pearson correlation, partial correlation, mutual information).*

Graph analysis

*Report the dependent variable and connectivity measure, specifying weighted graph or binarized graph, subject- or group-level, and the global and/or node summaries used (e.g. clustering coefficient, efficiency, etc.).*

Multivariate modeling and predictive analysis

*Specify independent variables, features extraction and dimension reduction, model, training and evaluation metrics.*
